# Supplementary material for: Major Surgical Trauma Impairs the Function of Natural Killer Cells but Does Not Affect Monocyte Cytokine Synthesis
Source: MDPI journal article supplement (doi:10.3390/life12010013), 2021-12-22
Supplement: s1 [file s1]

**Table S1.** Correlation of the concentration of GDF-15 1 d after surgery with IL-6, CRP, myoglobin, duration of surgery, and blood transfusion. GDF-15 levels in the serum obtained 1 d after surgery was tested for significant correlation using spearman correlation.

| Correlation of GDF-15<br>on d+1 with | <b>Spearman r</b> | <b>p-value</b> |
|--------------------------------------|-------------------|----------------|
| IL-6 d+1                             | 0.5804            | 0.0521         |
| CRP d+1                              | 0.3280            | 0.3221         |
| CRP d+2                              | 0.2857            | 0.5008         |
| Myo d+1                              | -0.098            | 0.7664         |
| Duration of surgery                  | 0.3020            | 0.2521         |
| Volume of blood trans-<br>fusion     | 0.4256            | 0.4256         |
